# Supplementary material
Source: PubMed Central journal article supplement (PMC4521602)
Supplement: NIHMS708007-supplement-Supplemental_table_1.pdf [file NIHMS708007-supplement-Supplemental_table_1.pdf]

|                                  | Estimate ( $\beta$ ) | Std. error (s.e.) | t-value ( $t$ ) |
|----------------------------------|----------------------|-------------------|-----------------|
| Trial number                     | -1.46E-04            | 2.01E-06          | -72.95          |
| Lexicality (word)                | 1.78E-01             | 1.65E-02          | 10.76           |
| Cohort size (CS)                 | -3.31E-01            | 2.34E-02          | -14.20          |
| Average cohort frequency (ACF)   | -2.35E-03            | 1.63E-03          | -1.44           |
| Summed cohort frequency (SCF)    | 6.98E-03             | 1.72E-03          | 4.05            |
| Time (linear)                    | -5.22E+00            | 3.33E-01          | -15.68          |
| Time <sup>2</sup> (quadratic)    | -4.09E+00            | 2.39E-01          | -17.16          |
| Time <sup>3</sup> (cubic)        | -1.72E+00            | 1.05E-01          | -16.43          |
| Time <sup>4</sup> (quartic)      | -5.23E-01            | 2.27E-02          | -23.05          |
| Anterior-posterior (AP) position | -6.82E-03            | 1.17E-03          | -5.84           |
| Dorsal-ventral (DV) position     | 4.79E-03             | 3.00E-03          | 1.60            |
| Lexicality * CS                  | -7.38E-03            | 2.19E-03          | -3.38           |
| Lexicality * ACF                 | -1.19E-04            | 1.97E-03          | -0.06           |
| Lexicality * SCF                 | 2.81E-03             | 1.97E-03          | 1.43            |
| CS * ACF                         | 5.60E-03             | 4.05E-04          | 13.84           |
| CS * SCF                         | -9.68E-04            | 1.48E-04          | -6.56           |
| ACF * SCF                        | -1.88E-03            | 1.29E-04          | -14.61          |
| Lexicality * time                | 3.51E+00             | 2.60E-01          | 13.53           |
| Lexicality * time <sup>2</sup>   | 3.26E+00             | 1.87E-01          | 17.48           |
| Lexicality * time <sup>3</sup>   | 1.55E+00             | 8.15E-02          | 19.00           |
| Lexicality * time <sup>4</sup>   | 3.26E-01             | 1.82E-02          | 17.89           |
| Lexicality * AP position         | 6.06E-03             | 8.93E-04          | 6.79            |
| Lexicality * DV position         | -2.35E-03            | 2.30E-03          | -1.02           |
| Time * AP position               | -1.53E-01            | 1.83E-02          | -8.39           |
| Time <sup>2</sup> * AP position  | -1.19E-01            | 1.31E-02          | -9.09           |
| Time <sup>3</sup> * AP position  | -6.24E-02            | 5.74E-03          | -10.88          |
| Time <sup>4</sup> * AP position  | -1.69E-02            | 1.24E-03          | -13.6           |
| Time * DV position               | -1.59E-02            | 4.71E-02          | -0.34           |
| Time <sup>2</sup> * DV position  | -3.08E-02            | 3.37E-02          | -0.91           |
| Time <sup>3</sup> * DV position  | -1.00E-02            | 1.48E-02          | -0.68           |
| Time <sup>4</sup> * DV position  | -6.36E-03            | 3.20E-03          | -1.99           |
| CS * time                        | -5.25E+00            | 3.73E-01          | -14.07          |
| CS * time <sup>2</sup>           | -4.22E+00            | 2.69E-01          | -15.69          |
| CS * time <sup>3</sup>           | -2.23E+00            | 1.18E-01          | -18.86          |
| CS * time <sup>4</sup>           | -6.87E-01            | 2.60E-02          | -26.46          |
| CS * AP position                 | -9.28E-03            | 1.29E-03          | -7.22           |
| CS * DV position                 | 3.21E-04             | 3.31E-03          | 0.10            |
| ACF * time                       | 7.66E-02             | 8.15E-03          | 9.40            |
| ACF * time <sup>2</sup>          | -4.67E-02            | 7.23E-03          | -6.46           |
| ACF * time <sup>3</sup>          | 5.12E-02             | 4.81E-03          | 10.65           |
| ACF * time <sup>4</sup>          | -2.36E-02            | 2.49E-03          | -9.49           |

|                                              | Estimate ( $\beta$ ) | Std. error (s.e.) | t-value ( $t$ ) |
|----------------------------------------------|----------------------|-------------------|-----------------|
| ACF * AP position                            | -9.96E-05            | 1.82E-05          | -5.47           |
| ACF * DV position                            | -2.59E-04            | 4.67E-05          | -5.55           |
| SCF * time                                   | -5.87E-02            | 8.31E-03          | -7.07           |
| SCF * time <sup>2</sup>                      | 8.59E-03             | 7.41E-03          | 1.16            |
| SCF * time <sup>3</sup>                      | -1.90E-02            | 4.82E-03          | -3.94           |
| SCF * time <sup>4</sup>                      | 1.59E-02             | 2.23E-03          | 7.15            |
| SCF * AP position                            | 1.33E-04             | 1.74E-05          | 7.64            |
| SCF * DV position                            | 4.05E-04             | 4.47E-05          | 9.07            |
| Lexicality * time * AP position              | 1.12E-01             | 1.42E-02          | 7.83            |
| Lexicality * time <sup>2</sup> * AP position | 9.69E-02             | 1.02E-02          | 9.48            |
| Lexicality * time <sup>3</sup> * AP position | 4.98E-02             | 4.46E-03          | 11.18           |
| Lexicality * time <sup>4</sup> * AP position | 1.23E-02             | 9.96E-04          | 12.33           |
| Lexicality * time * DV position              | -8.59E-03            | 3.67E-02          | -0.23           |
| Lexicality * time <sup>2</sup> * DV position | 1.94E-02             | 2.64E-02          | 0.74            |
| Lexicality * time <sup>3</sup> * DV position | 1.61E-02             | 1.15E-02          | 1.40            |
| Lexicality * time <sup>4</sup> * DV position | 2.91E-03             | 2.57E-03          | 1.13            |
| CS * time * AP position                      | -1.57E-01            | 2.05E-02          | -7.65           |
| CS * time <sup>2</sup> * AP position         | -1.34E-01            | 1.47E-02          | -9.10           |
| CS * time <sup>3</sup> * AP position         | -7.12E-02            | 6.49E-03          | -10.97          |
| CS * time <sup>4</sup> * AP position         | -2.11E-02            | 1.41E-03          | -14.97          |
| CS * time * DV position                      | 8.13E-03             | 5.29E-02          | 0.15            |
| CS * time <sup>2</sup> * DV position         | -2.13E-02            | 3.79E-02          | -0.56           |
| CS * time <sup>3</sup> * DV position         | -2.08E-02            | 1.67E-02          | -1.25           |
| CS * time <sup>4</sup> * DV position         | -1.51E-02            | 3.63E-03          | -4.17           |
| ACF * time * AP position                     | 1.36E-03             | 3.08E-04          | 4.42            |
| ACF * time <sup>2</sup> * AP position        | -2.21E-03            | 2.84E-04          | -7.78           |
| ACF * time <sup>3</sup> * AP position        | 7.93E-04             | 2.01E-04          | 3.94            |
| ACF * time <sup>4</sup> * AP position        | 3.27E-05             | 1.18E-04          | 0.28            |
| ACF * time * DV position                     | 7.02E-03             | 7.90E-04          | 8.89            |
| ACF * time <sup>2</sup> * DV position        | -6.44E-03            | 7.28E-04          | -8.85           |
| ACF * time <sup>3</sup> * DV position        | 6.12E-03             | 5.17E-04          | 11.85           |
| ACF * time <sup>4</sup> * DV position        | -2.19E-03            | 3.03E-04          | -7.22           |
| SCF * time * AP position                     | -1.53E-03            | 3.04E-04          | -5.02           |
| SCF * time <sup>2</sup> * AP position        | 1.16E-03             | 2.76E-04          | 4.20            |
| SCF * time <sup>3</sup> * AP position        | -3.51E-04            | 1.88E-04          | -1.87           |
| SCF * time <sup>4</sup> * AP position        | -2.57E-05            | 9.83E-05          | -0.26           |
| SCF * time * DV position                     | -5.61E-03            | 7.80E-04          | -7.18           |
| SCF * time <sup>2</sup> * DV position        | 4.07E-03             | 7.08E-04          | 5.75            |
| SCF * time <sup>3</sup> * DV position        | -3.76E-03            | 4.82E-04          | -7.80           |
| SCF * time <sup>4</sup> * DV position        | 1.66E-03             | 2.52E-04          | 6.58            |

**Supplemental table 1: Full coefficient table for fixed effects, GCA model.** All fixed effects coefficients, standard error, and t-values are shown. Predictors which are not significant ( $t < 2$ ) are greyed out.
